# Supplementary material for: Continuous learning of emergent behavior in robotic matter
Source: PubMed Central journal article supplement — Proc Natl Acad Sci U S A. 2021 May 10;118(21):e2017015118. doi: 10.1073/pnas.2017015118 (PMC8166149; doi:10.1073/pnas.2017015118), 2021-05-10
Supplement: pnas.2017015118.sapp.pdf [file pnas.2017015118.sapp.pdf]

1

## 2 **Supplementary Information for**

### 3 **Continuous Learning of Emergent Behavior in Robotic Matter**

4 **Giorgio Oliveri, Lucas C. van Laake, Cesare Carissimo, Clara Miette, Johannes T.B. Overvelde**

5 **Corresponding Author Johannes T.B. Overvelde.**  
6 **E-mail: [overvelde@amolf.nl](mailto:overvelde@amolf.nl)**

#### 7 **This PDF file includes:**

- 8     Supplementary text
- 9     Figs. S1 to S14
- 10    Legends for Movies S1 to S5
- 11    SI References

#### 12 **Other supplementary materials for this manuscript include the following:**

- 13     Movies S1 to S5

## 14 Supporting Information Text

### 15 Fabrication of units

16 Each unit consists of a micro-controller (ESP32), a motion sensor (ADNS-9800) and a pressure sensor (Honeywell MPRLS0015  
17 PG0000SA), mounted on a custom made PCB embedded in a 3D printed frame with a total dimension of  $68 \times 44 \times 42$  mm.  
18 The frame is designed to support a micro-pump (Huizhou Yingyi Motor Co. YYP032), a 3.7V battery (Carson 500608131), and  
19 has two mechanical snap connectors to attach the soft actuators. The soft actuators consist of three bellows of 25 mm outer  
20 diameter, a length of 35 mm and a total inner volume of  $\approx 2$  ml, which were moulded using a soft elastomer (Smooth-ON  
21 Dragon Skin 30). The mould consists of two external components printed on a polyjet printer (Stratasys Eden260VS), and  
22 a soluble PVA core printed on a FDM printer (Ultimaker 3). After casting, the soft actuators were connected to a water  
23 pump (Eheim 1250-790) to flush out the soluble core over a period of approximately two days. The actuators were connected  
24 on both sides to luer lock couplings (Nordson Medical FTLL035-1 and MLRL035-1) with heat-shrink tubes (RS-458-068).  
25 One side of the actuator is then connected to a venting needle (Metcalf 9922050-TE gauge 22, inner diameter of 0.412 mm  
26 and length of 11 mm), via a male-female luer elbow coupling (Nordson Medical LE87-1), and two luer lock caps (Nordson  
27 Medical FSLLR-3). The other side of the actuator is connected to the pump and the pressure sensor via a silicone tube  
28 (outer and inner diameter 3 mm and 1.5 mm, respectively), fitted with a barb to luer lock connector (Nordson Medical  
29 MLRL007-1). The mass  $m$  of each unit is equal to 63.7 g, including 10.2 g for the complete actuator and 10.8 g for the  
30 battery. After connecting two units using a soft actuator, the distance at rest between the two adjacent units equals 62 mm.  
31 Importantly, the assembled units touch the surface using four  $5.5 \times 8$  mm screws. To maximize the accuracy of the motion  
32 sensor, the distance of the PCB from the surface was set to be  $\approx 5$  mm, achieved with a screw head of 3 mm thickness, and  
33 four nylon rings of 0.54 mm thickness per screw. The width of the units at the place they touch the ground (i.e., width between  
34 the screws), which fits into the track, has dimension of 55.4 mm. An overview of the components and assembly is given in Fig. S10.  
35

### 36 Experimental setup

37 The learning experiments are launched by initiating each unit at a random phase  $\phi_i$ . The initialization is done via a WiFi  
38 connection that is made with each unit sequentially. While the WiFi connection is not needed to perform the experiments,  
39 the connection is used to gather sensor data during the experiments at a 10 Hz rate. After initialization, the units try out  
40 new phases after every  $n_{\text{act}} = 2$  cycles of  $t_{\text{cycle}} = 2$  s duration. During these two cycles, the phase  $\phi_i$  is kept constant. In the  
41 first cycle, the change to the phase is made by scaling the total duration of the cycle according to  $1 - (\phi'_i - \phi_i)/t_{\text{cycle}}$ . Note  
42 that for both cycles, the pump is only turned on in the first  $\alpha = 0.4$  portion of each cycle. After performing two cycles, each  
43 unit determines its average velocity  $U'$  that is used in the learning algorithm. To determine the velocity, note that within  
44 each actuation cycle the optical motion sensors take 10 displacement measurements per second as shown in Fig. S11, and the  
45 unit displacement for the learning step is determined by comparing the absolute displacement at the beginning and end of  
46 the second actuation cycle (the measurements that are located at the dashed lines). The velocity can then be determined by  
47 dividing the displacement by the actuation cycle duration of  $t_{\text{cycle}} = 2$  s. Note that the implementation of the phase change,  
48 which results in an elongating or shortening of the duration of the first cycle, introduces some differences in measured velocity  
49 between units of the same robots at the same learning step, because the evaluation periods start and finish at different times.  
50 By comparing the measured velocity  $U'$  with the velocity  $U$  stored in memory, each unit determines the acceptance probability  
51 of the current phase  $\phi'$  according to  $p(\Delta U) = e^{(U' - U)/T}$ , in which  $T = 0.1$ . Using the phase that is stored in memory  $\phi$ , each  
52 unit then perturbs its phase according to  $\phi' = \phi + \epsilon \Delta s$  to obtain a new candidate phase, in which  $\epsilon$  is a random number drawn  
53 from a uniform distribution on the interval  $[-1, 1]$ , and  $\Delta s = 0.1$  is the used stepsize. Note that while the units are initialized  
54 at the same time, the internal clocks of the units are not further synchronized and will go out of sync over time. While this is  
55 not corrected during learning (which should also not be necessary as the units should be able to adapt to this), for plotting  
56 purposes we take the learning step as reference. While the units can operate on battery, to allow for continuous testing most of  
57 the experiments were run by powering the units with a common power supply, attached to one of the active units. Power is  
58 then delivered to the other units via a unit-to-unit connection placed below the soft actuator. Moreover, the experiments were  
59 performed on a lasercut circular POM track screwed on a MDF surface. The diameter of the track is  $D \approx 0.854$  m, and the  
60 track width is  $w = 56.4 \pm 0.4$  mm.

### 61 The learning algorithms

62 Each unit runs an identical algorithm. The pseudocode for the two algorithms (Thermal and Flaky) tested in this work are  
63 given in Fig. S1.

### 64 Numerical model

65 We model the robot's behavior with a mass-spring system that exhibits friction with its environment (Fig. S12a). Each  $i$ -th  
66 unit consists of a mass  $m_i$ , and an actuator with stiffness  $k_i$  and initial length  $L_i$ . Furthermore, we assume that each unit  
67 experiences a nonlinear friction  $F(\dot{x}_i)$  with the surface that depends on its velocity. We can then write the system's equation of  
68 motion as follows,  
69

$$\mathbf{M}\ddot{\mathbf{x}} = -\mathbf{K}\mathbf{x} - \mathbf{F}(\dot{\mathbf{x}}) + \mathbf{A}(t), \quad [1]$$

where  $\mathbf{M}$  is a mass matrix,  $\mathbf{K}$  is a stiffness matrix,  $\mathbf{F}$  is a friction force vector and  $\mathbf{A}$  a vector containing the actuation forces exerted by the actuators on the connected masses. Note that the forces that are applied by each actuator are modelled by changing the rest length  $L_i$  of each spring by a deformation  $\Delta L_i(t)$ , such that the actual rest length of the actuator at any moment in time equals  $l_i(t) = L_i + \Delta L_i(t)$ . Specifically, the matrices for the assembled system containing  $n - 1$  active units (i.e.,  $n$  masses) are equal to

$$\mathbf{M} = \begin{bmatrix} m_1 & & & & \\ & m_2 & & & \\ & & \ddots & & \\ & & & \ddots & \\ & & & & m_n \end{bmatrix},$$

$$\mathbf{K} = \begin{bmatrix} k_1 & -k_1 & & & & \\ -k_1 & k_1 + k_2 & -k_2 & & & \\ & \ddots & \ddots & \ddots & & \\ & & -k_{n-2} & k_{n-2} + k_{n-1} & -k_{n-1} & \\ & & & -k_{n-1} & k_{n-1} & \end{bmatrix},$$

$$\mathbf{A}(t) = \begin{bmatrix} k_1 l_1(t) \\ k_2 l_2(t) - k_1 l_1(t) \\ \vdots \\ k_{n-2} l_{n-2}(t) - k_{n-1} l_{n-1}(t) \\ k_{n-1} l_{n-1}(t) \end{bmatrix}.$$

As an example, if we assume that all units are identical (i.e.,  $m_i = m$  and  $k_i = k$ ), for two active units we have

$$m \begin{bmatrix} 1 & & \\ & 1 & \\ & & 1 \end{bmatrix} \begin{bmatrix} \ddot{x}_1 \\ \ddot{x}_2 \\ \ddot{x}_3 \end{bmatrix} = -k \begin{bmatrix} 1 & -1 & \\ -1 & 2 & -1 \\ & -1 & 1 \end{bmatrix} \begin{bmatrix} x_1 \\ x_2 \\ x_3 \end{bmatrix} - \begin{bmatrix} F(\dot{x}_1) \\ F(\dot{x}_2) \\ F(\dot{x}_3) \end{bmatrix} + k \begin{bmatrix} l_1(t) \\ l_2(t) - l_1(t) \\ l_2(t) \end{bmatrix}. \quad [2]$$

In experiments, the pump is cyclically turned on and off for  $t_{\text{on}}$  and  $t_{\text{off}}$  seconds, respectively. When the pump is turned on, the flow into the soft actuator is approximately constant. Simultaneously, the actuator vents air through a needle. To model the inflation and deflation cycle of the actuator characterized by the actuation function  $l_i(t)$  in Eq. (1), we turn to an electronic analogy (1). If we assume the pump acts like a current source, the actuator as a capacitor, and the needle as a resistor (with parameters  $I$ ,  $C$  and  $R$ , respectively), the voltage  $V$  in the capacitor during one full cycle (representing the pressure in the actuator) is given by

$$V = \begin{cases} V_{\text{off}} + (IR - V_{\text{off}})(1 - e^{-t/(RC)}) & \text{for } 0 \leq t \leq t_{\text{on}} \\ V_{\text{on}} e^{-t/(RC)} & \text{for } t_{\text{on}} \leq t \leq t_{\text{off}} + t_{\text{on}}, \end{cases} \quad [3]$$

where  $V_{\text{off}}$  is the voltage in the capacitor at the end of the previous deflation step, and  $V_{\text{on}}$  is the voltage in the capacitor at the end of the inflation step. We next transform this voltage to extension of an actuator by assuming  $\Delta L = \beta V$ , such that

$$l_i(t) = L_i + \beta V_i, \quad [4]$$

where we assumed a linear relation between the pressure inside the actuator and the extension of the actuator.

We model the friction force  $F(\dot{x})$  for each mass as a combination between a Coulomb  $F_C(\dot{x})$  and a viscous  $F_V(\dot{x})$  friction (2). The Coulomb friction is given by

$$F_C(\dot{x}) = (\mu_{\text{Brk}} mg) \tanh\left(\frac{\dot{x}}{v_C}\right), \quad [5]$$

in which  $\mu_{\text{Brk}}$  is the breakaway friction coefficient between each mass and the surface,  $g$  is the gravitational constant, and  $v_C$  is the Coulomb velocity threshold which scales the speeds at which the friction barrier is broken. Moreover, the viscous friction equals

$$F_V(\dot{x}) = c\dot{x}, \quad [6]$$

where  $c$  is the viscous damping coefficient. The total friction force that acts on each mass equals

$$F(\dot{x}) = F_C(\dot{x}) + F_V(\dot{x}). \quad [7]$$

Note that the  $\mu_{\text{Brk}}$  parameter for the Coulomb friction can be observed experimentally. In contrast, from an experimental perspective  $v_C$  is ideally equal to zero. However, in simulations we used  $v_C = 0.001$  to smooth the transition and prevent numerical problems. Moreover, we included the viscous term  $F_V$  to numerically dampen the system and avoid possible numerical instabilities or high-frequency oscillations. We noticed that the choice of parameter  $c$  only effects the quantitative agreement between simulations and experiments shown in Fig. 1g, and we found a value of  $c = 5$  to be appropriate.

## 86 Simulation setup

87 To determine the motion of the assembled system of equations, we numerically solve Eq. (1) using the implicit Radau method  
88 implemented in a custom script in Python with the SciPy integration library (version 1.4.1). To perform a learning simulation,  
89 in the setup phase a worm object is instantiated and all parameters are set to their initial values. This includes the resting  
90 length of the springs which is always set to a constant value of  $L = 60$  mm. A random phase  $\phi_i$  is assigned to each unit, along  
91 with a fixed number of learning steps and a fixed number of actuation cycles  $n_{\text{act}} = 10$  per learning step, during which the  
92 phases  $\phi_i$  are kept constant. After the last learning step, units calculate their score  $U'$  as the average distance travelled relative  
93 to the number of actuation cycles. Units use this score to update their phases as done in experiments. Similarly, the phases  
94 are also perturbed in the same way after each learning step, and new candidate phases  $\phi'_i$  are set for the next learning step.  
95 Note that at the beginning of every learning step, we reset the displacements of the units to their rest length, such that the  
96 system undergoes transient behavior during the first actuation cycle, as can be seen in the first seconds in Fig. S12d. This is  
97 the result of the difference between the natural rest length of the spring 60 mm, and the new rest length as determined by the  
98 new actuation phase  $\phi'_i$ . This does not significantly affect the  $U'$ , as we use a relatively large number of actuation steps.  
99

## 100 Model parameter measurements

101 To characterize the behavior of the soft actuator (i.e., stiffness  $k$  and the extension  $\Delta L$ ), we measured the force-displacement  
102 response of the actuator using a mechanical testing machine (Instron 5965L9510). To determine the stiffness, we start with an  
103 actuator that is open to the surroundings and perform a pulling experiment four times, in which we deform the actuator at a  
104 constant deformation rate of 120 mm/min to an extension of 20 mm, return to the initial position, and compress 3 mm beyond  
105 the initial position (Fig. S13a). Based on these results, we extract the slope of the curve to determine the stiffness  $k$  of the  
106 actuator, as shown in Fig. S13b.

107 To determine if the stiffness of the actuator depends on the internal pressure, we next performed a second experiment where  
108 we start with an unpressurized, but closed actuator, and performed the same extension/compression testing routine. We then  
109 add 1 ml of air to the actuator using a syringe pump, leading to an increase in the internal pressure. We then closed a valve in  
110 order to disconnect the syringe during the pulling experiment and repeated this procedure for a total of four measurement  
111 cycles. In Fig. S13c-d we show the measured force-deformation curves and the corresponding stiffness  $k$  for the closed cases,  
112 respectively. We find that the stiffness is not significantly affected by the internal pressure when the actuator is closed to the  
113 surroundings. It is important to note that during compressive loading at small or negative extensions the actuator undergoes  
114 a global buckling instability that suddenly changes the stiffness (Fig. S13c-d). However, such an instability has never been  
115 observed in the actuators during normal operation of the units. Moreover, we also find that the closing of the actuator to the  
116 surroundings increases the stiffness. This is likely the result of the enclosed air that acts as an additional spring. Since the  
117 experimental situation is between open and closed, and preliminary results showed that the response is qualitatively identical  
118 independently of the exact numerical value of stiffness, we chose  $k = 100$  N/m for the numerical simulations.

119 To determine the parameters used to specify the actuation cycle, we measure the maximum extension  $\Delta L_{\text{max}}$  and  
120 corresponding pressure  $P_{\text{max}}$  of the actuator during cyclic operation. We find that  $\Delta L_{\text{max}} = 12.5$  mm and  $P_{\text{max}} = 6$  kPa.  
121 Given that the maximum pressure in the actuator equals the maximum voltage  $V_{\text{on}} = 6$  in our fluidic-electric model (Eq. (4)),  
122 we find that  $\beta \approx 2.08$  mm/kPa. We next tune  $I$ ,  $R$  and  $C$  such that  $V_{\text{on}} \approx 6$ , and  $V_{\text{off}} \approx 0.01V_{\text{on}}$  (such that the actuator is  
123 empty at the end of the deflation cycle). We find that values of  $I = 0.35$ ,  $R = 18$  and  $C = 0.0145$  give a realistic inflation and  
124 deflation behavior according to Eq. (3), as shown in Fig. S12b.

125 To characterize the friction  $F(\dot{x})$  of the unit moving on the experimental table, we attached one unit to a horizontal  
126 material testing machine (Instron 5900 equipped with 100 N load cell) as shown in Fig. S14a), and measured the reaction  
127 force when prescribing a displacement (Fig. S14b) to the unit that is moving on a similar surface as the one used in the  
128 learning experiments. Note that we used the bottom part of one of the units, and placed additional weight on it to a total of  
129  $m_{\text{Test}} = 0.811$  kg, in order to increase the resolution in our measurements. To understand if this coefficient is influenced by the  
130 relative speed of the units, we performed five tests in which a maximum displacement of 126 mm is reached after ramping up  
131 and ramping down the displacement rate as shown in Fig. S14b. Assuming that the friction force is equal to  $\mu_{\text{Brk}} m_{\text{Test}} g$ , the  
132 resulting friction coefficient  $\mu_{\text{Brk}}$  is shown in Fig. S14c. Apart from the initial increase in friction coefficient when the unit is  
133 set into motion, we find an approximate constant friction force as a function of the unit's relative velocity. Based on this result,  
134 we chose  $\mu_{\text{Brk}} = 0.24$  as the breakaway friction coefficient in our numerical model (Eq. (5)). The final friction behavior is  
135 shown in Fig. S12c.

## 136 Difference between experiments and simulations

137 We believe that the noise observed in experiments is mainly caused by three effects, related to the sensing hardware,  
138 decentralization, and environment.

139 First, while the position sensor is relatively precise (steps of 0.016 mm) and can handle much higher speeds (up to 150 mm/s),  
140 we do observe some rotation when the units are moving along the track. Such rotation is not captured by the sensors, and could  
141 therefore cause an integration error. This causes a relatively high noise for phases that result in approximately no movement.

142 Second, since measurements of the position are done separately by each unit, the moment at which the position is measured  
143 by each unit varies in time (e.g., see Fig. S11). Therefore, when one unit is measuring its displacement, another unit might

144 still be moving. This effect is furthermore strengthened by the fact that units' internal clocks go out of sync as the learning  
145 progresses. This noise therefore depends on the state of the system, and the time during experiments.

146 Third, experimental noise is also caused by variations in the track (the track has been the same for all experiments). As  
147 mentioned in the section on experimental setup, some regions of the tracks are narrower than others, where we observe a  
148 standard deviation of  $\sim 0.4$  mm between the 20 measurements at different track locations. This causes the units' feet to  
149 experience more play in some regions and less in others, leading to small rotations besides the tangential translation when  
150 pushed by the actuators. This is also demonstrated by the results in Fig. 2d, where we show the average measured velocities  
151 across the system for 20 measurements starting from different initial positions. In Fig. 2d we show the standard deviation  
152 between these measurements highlighting the large variation in performance for fixed phase combinations and different positions.  
153 Some of the individual experimental scan can be seen in Fig. S4, where the landscape is explored by fixing  $\phi_1 = 0$  and  $\phi_2$ , and  
154 varying  $\phi_3$ . There is a significant dependency of the potential behavior the units can exhibit and where they are on the track,  
155 and so this effect is rather a dynamic condition, rather than noise.

156 To determine if the velocity measurement taken by the local sensors is accurate, we also compare the units' displacement  
157 measurements with an external camera. Considering the experiment with fixed phases for three active units in Movie 2, we  
158 see that it takes approximately 1182 seconds to complete a full circle of length 2.68 meters. Comparing this to the distance  
159 measured with the sensors, we find the three motion sensors underestimate the traveled distance with relative errors of 1%, 9.7%  
160 and 10.7% respectively.

161 Importantly, we did not try to further reduce the above effects, but rather embrace them, as one of our goals is to design  
162 a robust learning algorithm that is capable of dealing with dynamic (and noisy) situations. Note that all three cases have  
163 not been included in most simulations, except for a noise term similar to sensor noise that we have studied in Fig. S5, and  
164 changing friction and damage shown in Fig. S6 and Fig. S7, respectively.

---

**Algorithm 1** Thermal algorithm in pseudocode

---

- 1: Initialize random phase  $\phi$
- 2: Evaluate velocity  $U$
- 3: **for** Step in  $n_{\text{learn}}$  **do**
- 4:   Perturb phase stored in memory  $\phi' = \phi + \epsilon\Delta s$
- 5:   Evaluate new velocity  $U'$
- 6:   Determine acceptance probability  $p(\Delta U) = e^{(U'-U)/T}$
- 7:   **if**  $p(\Delta U) \geq \text{rand}(0, 1)$  **then**
- 8:     Store new phase in memory  $\phi = \phi'$
- 9:     Store new velocity in memory  $U = U'$

---

---

**Algorithm 2** Flaky algorithm in pseudocode

---

- 1: Initialize random phase  $\phi$
- 2: Evaluate velocity  $U$
- 3: **for** Step in  $n_{\text{learn}}$  **do**
- 4:   Perturb phase stored in memory  $\phi' = \phi + \epsilon\Delta s$
- 5:   Evaluate new velocity  $U'$
- 6:   Determine acceptance probability  $p(\Delta U) = e^{(U'-U)/T}$
- 7:   **if**  $p(\Delta U) \geq \text{rand}(0, 1)$  **then**
- 8:     Store new phase in memory  $\phi = \phi'$
- 9:   Store new velocity in memory  $U = U'$

---

**Fig. S1.** Pseudocode of the Thermal and Flaky algorithms.

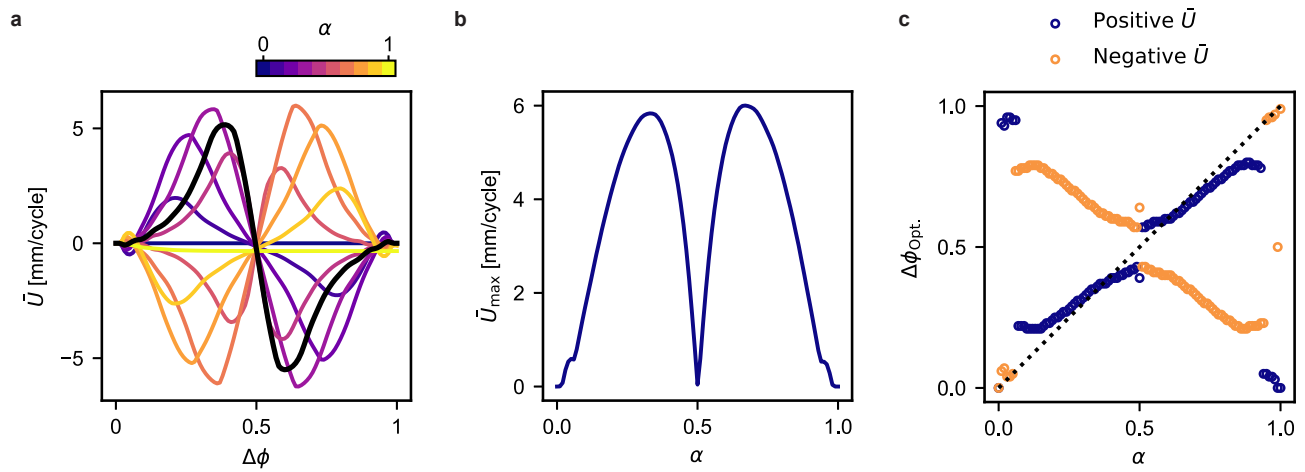

**Fig. S2. Simulations to determine the influence of the actuation duration  $\alpha$  on the displacement of a two active unit robot.** **a**, Average velocity of the assembled robot as a function of the phase difference  $\delta\phi = \phi_2 - \phi_1$ , for different values of  $\alpha$ . The black line shows the response for  $\alpha = 0.4$ , that has been used throughout our studies. **b**, Maximum system velocity  $\bar{U}_{\max}$  as a function of  $\alpha$ . **c**, Optimal phase difference  $\Delta\phi_{\text{opt}}$ , (for both positive and negative  $\bar{U}$ ) as a function of  $\alpha$ .

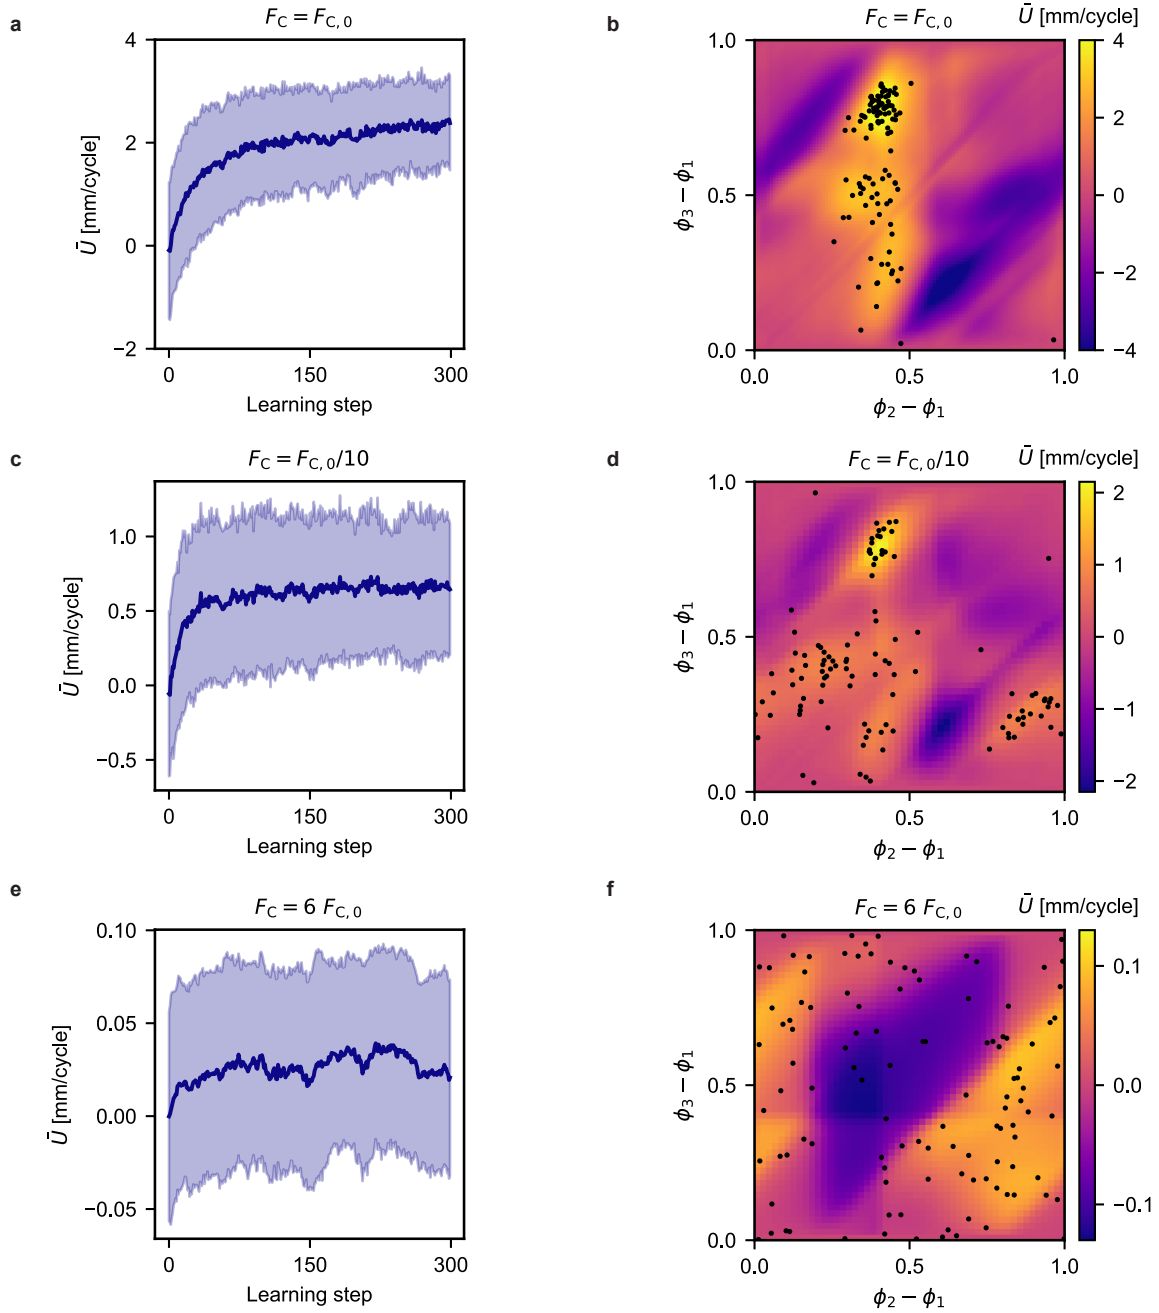

**Fig. S3. Effect of friction on the potential velocity and ability to learn of a three active units robot running the Flaky algorithm.** We performed 112 simulations for each of three different frictions, where we determine both the average velocity  $\bar{U}$  as a function of the learning step (where the shaded area represents the standard deviation), and the optimal phase combinations reached at the end of the last learning step, as indicated by the dots in the contour plot. **a-b**, Results for the friction similar to the experiments ( $F_C = F_{C,0}$ ) as used throughout our studies. **c-d**, Results for reduced friction ( $F_C = F_{C,0}/10$ ), qualitatively similar to the robot moving on ice. **e-f**, Results for increased friction ( $F_C = 6 F_{C,0}$ ).



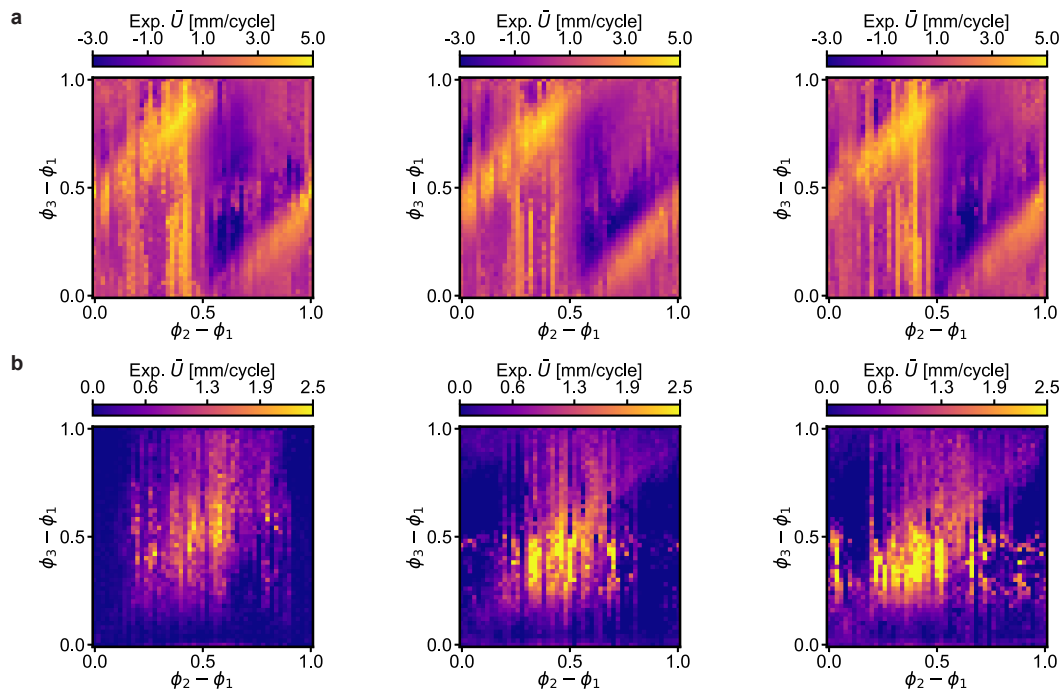

**Fig. S4. Selection of experimental velocity scans for an assembled robot consisting of three active units and one dummy unit.** The results show three out of 20 experimental runs that were used to determine the average speed  $\bar{U}$  as a function of all the possible combinations of phases  $\phi_3 - \phi_1$  and  $\phi_2 - \phi_1$  (with  $\phi_1 = 0$ ), for (a) an undamaged and (b) a damaged robot. Each scan is initialized by placing the robot at different starting positions.

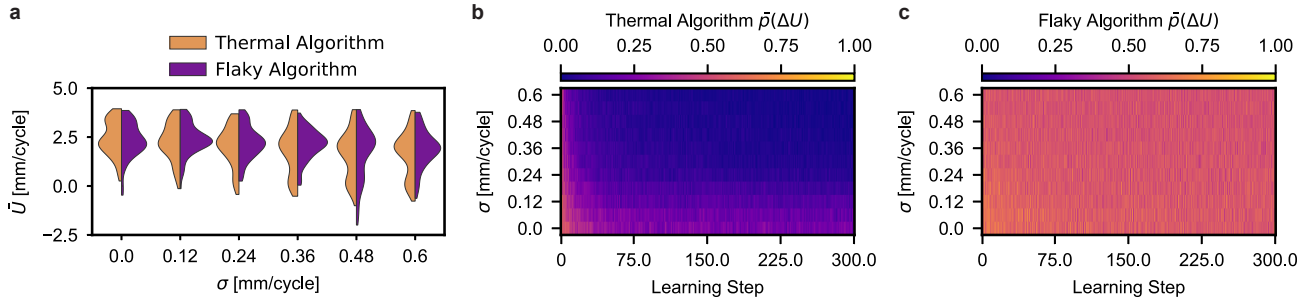

**Fig. S5. Effect of noise on learning strategies.** To understand how the performance of the Thermal and Flaky algorithms are effected by noise, we performed simulations on a assembled robot consisting of three active and one dummy unit, in which the measured speed  $U_i$  of each unit was altered by a random value  $u$  drawn from a Gaussian distribution with standard deviation ranging from  $0 \leq \sigma \leq 0.6$ . For each selected value of  $\sigma$  we performed 100 simulations. **a**, Distribution of measured velocities after 300 learning steps, as a function of the standard deviation  $\sigma$  of the noise applied. We notice that for both algorithms, even for larger values of the standard deviation, the system learns how to move (although less effectively). However, for the Thermal algorithms and for an applied noise with  $\sigma > 0.24$  [mm/cycle] we see an increasing number of simulations with  $\bar{U} \approx 0$ . **b**, Important to note is that for the Thermal algorithm the noise level has a large effect on the acceptance probability  $\bar{p}(\Delta U)$ , which quickly tends to go to zero for increasing number of learning steps and for  $\sigma > 0.024$  [mm/cycle]. **c**, In contrast, noise does not seem to effect the acceptance probability  $\bar{p}(\Delta U)$  when using the Flaky algorithm.

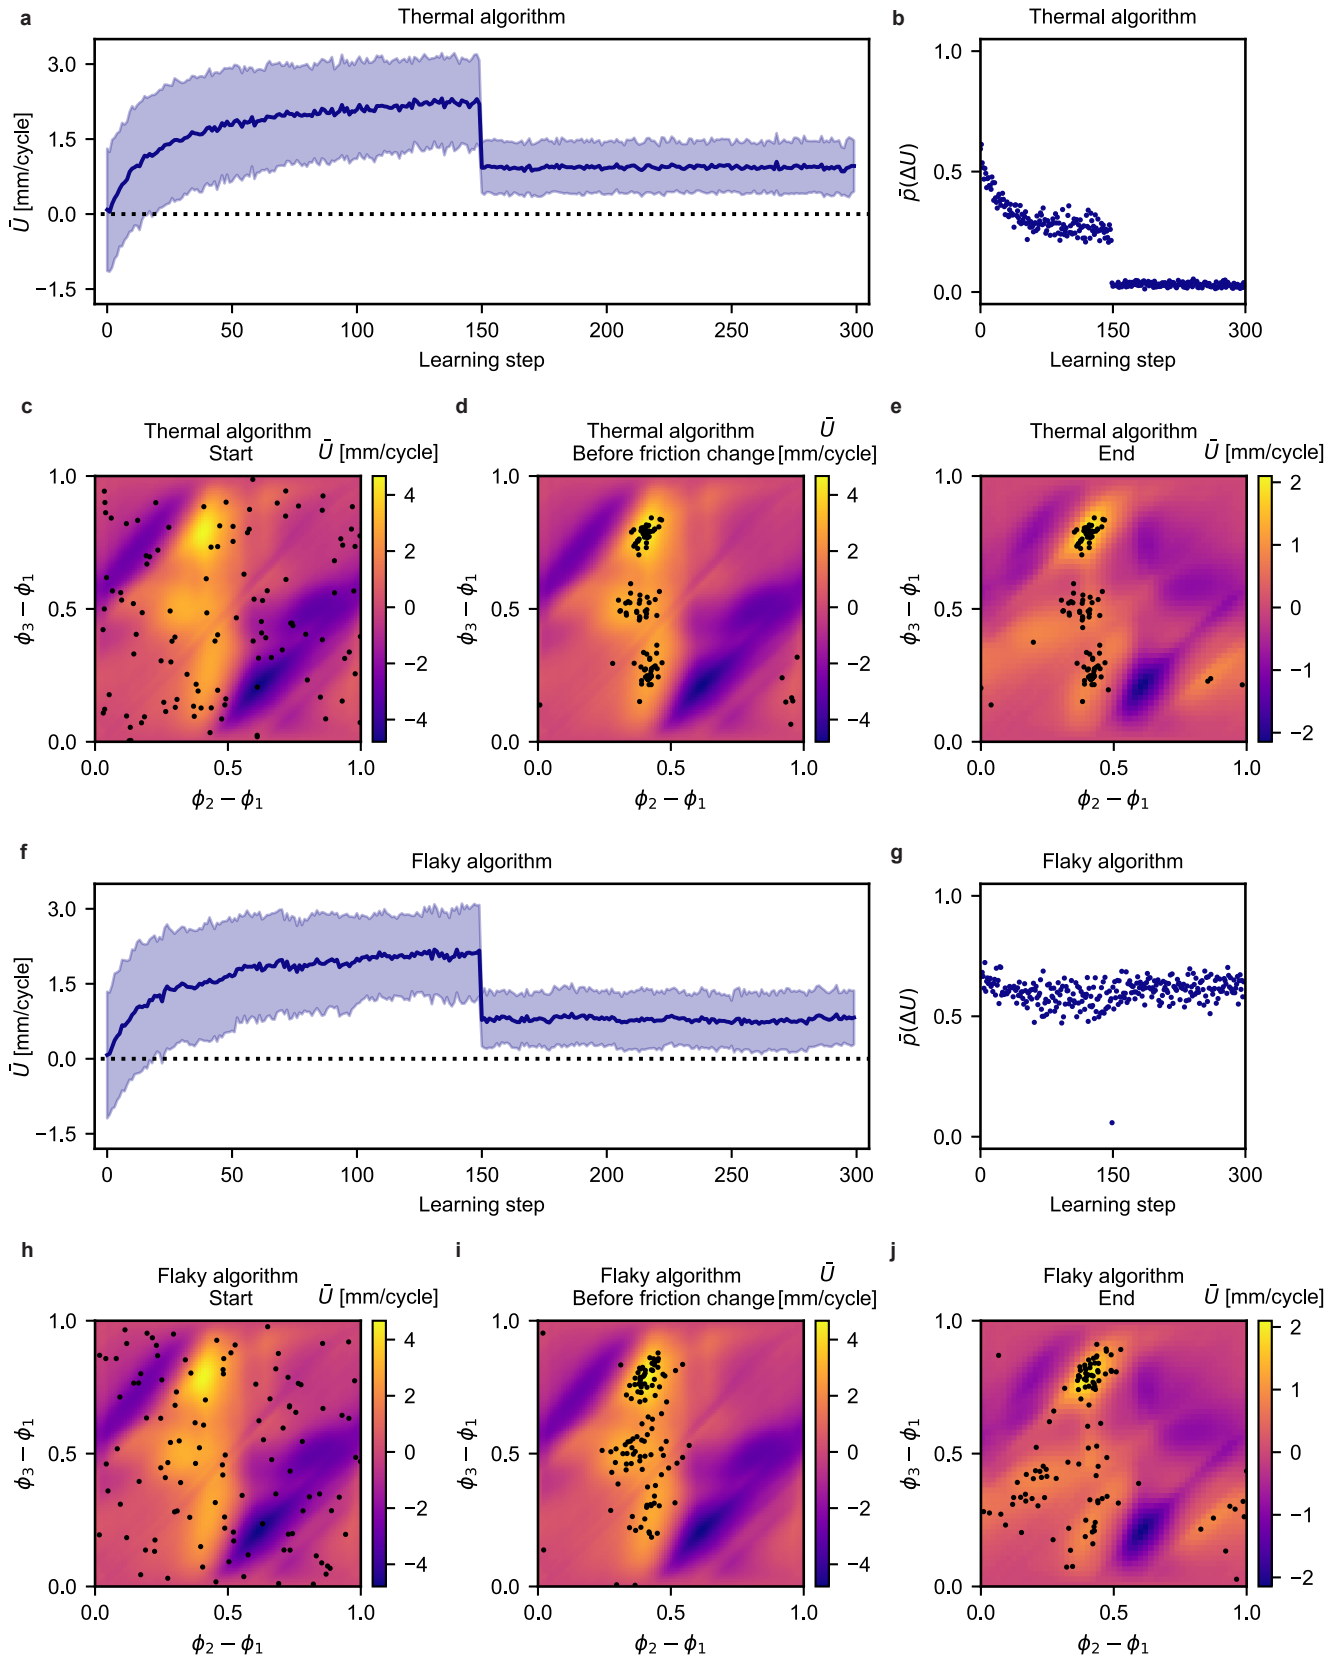

**Fig. S6. Learning simulations of a three active units robot with sudden and sharp drop in friction at the 150<sup>th</sup> learning step for both Thermal (a-e) and Flaky algorithms (f-j).** The results of 112 simulations per algorithm type are shown in terms of average velocity  $\bar{U}$  and average acceptance rate  $\bar{p}$ , as a function of the learning step (a-b and f-g). In c-e and h-j we show the optimal phases combinations at the beginning of the learning, just before the friction change, and at the end of the last learning step.

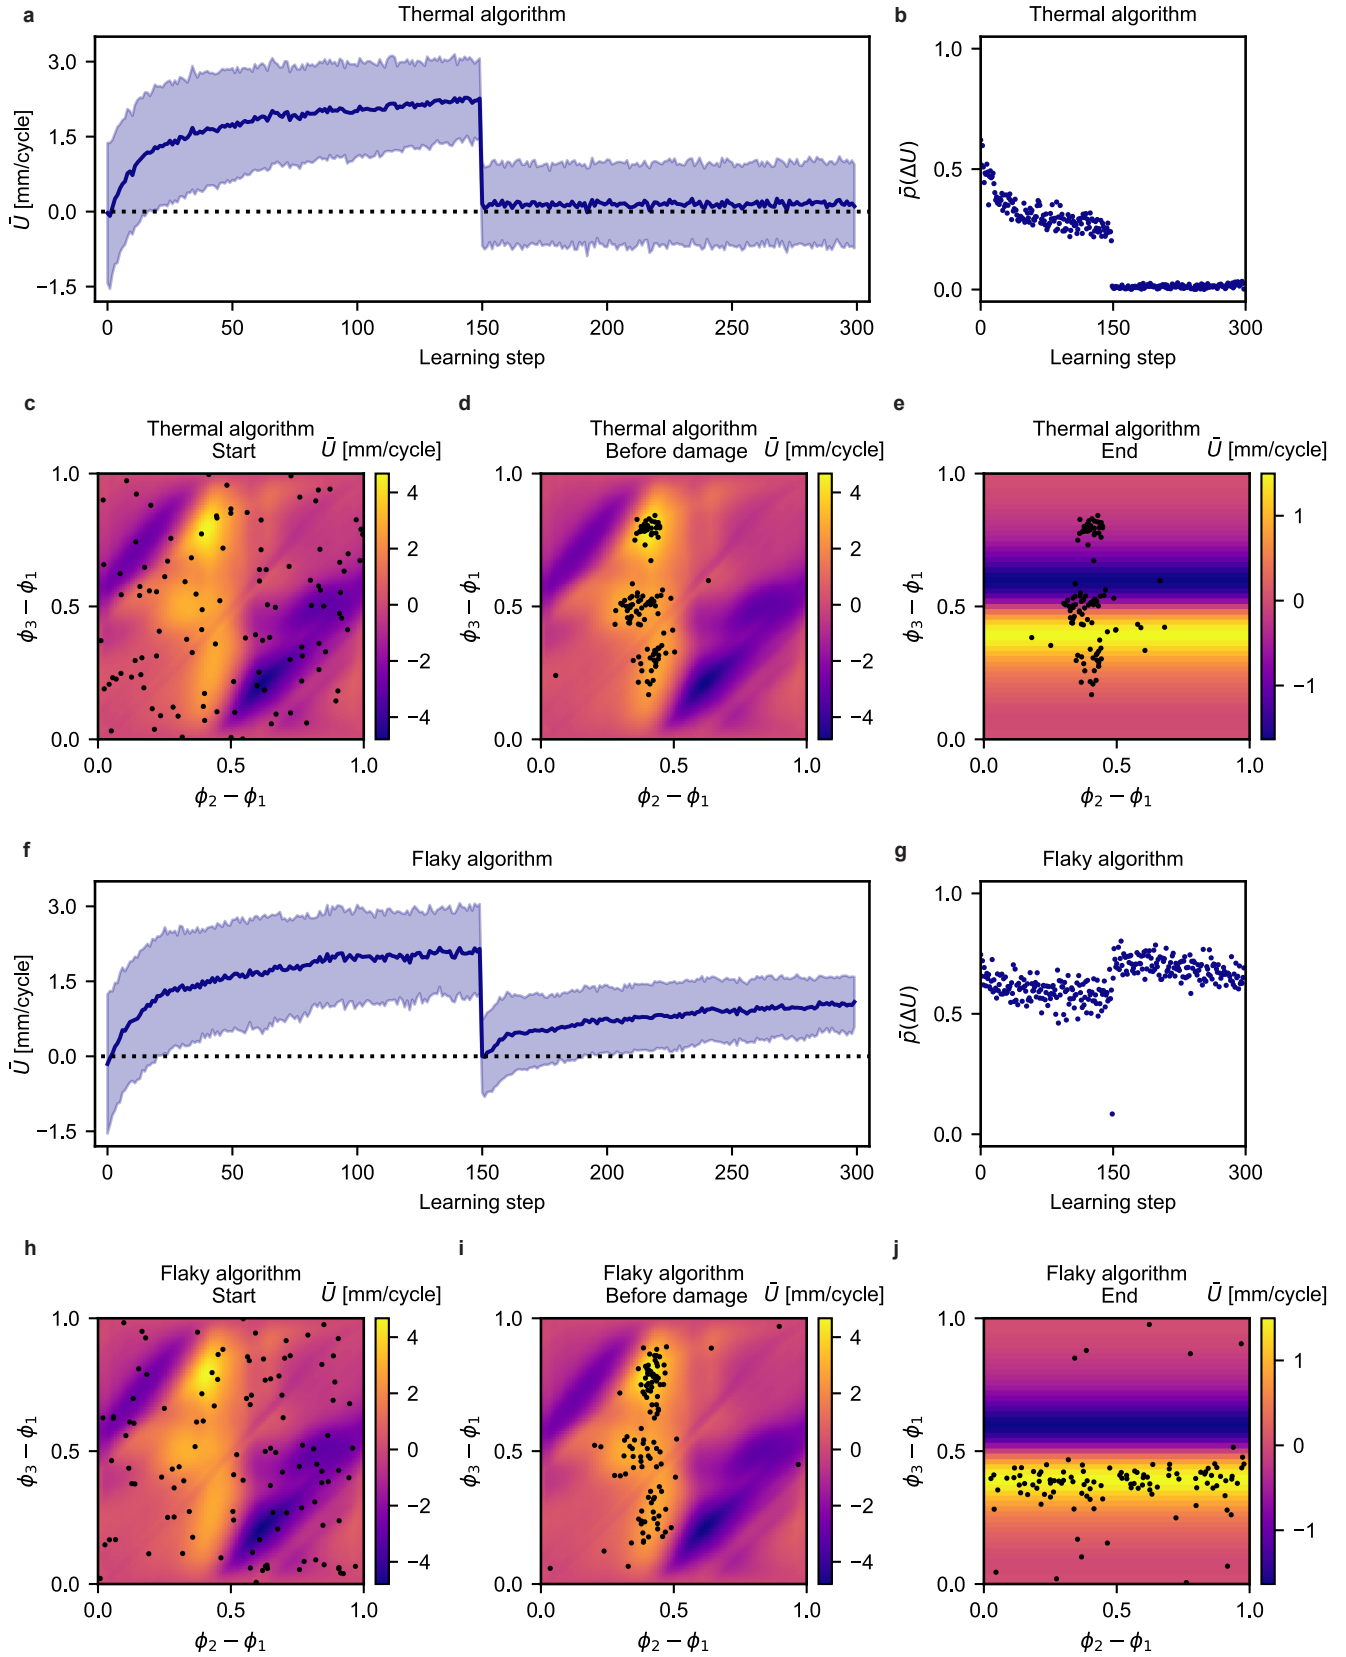

Fig. S7. Learning simulations of a three active units robot with sudden damage on the second unit at the 150<sup>th</sup> learning step for both Thermal (a-e) and Flaky algorithms (f-j). The results of 112 simulations per algorithm type are shown in terms of average system velocity  $\bar{U}$  and average acceptance rate  $\bar{p}(\Delta U)$ , as a function of the learning step (a-b and f-g). In c-e and h-j we show the optimal phases combinations at the beginning of the learning, just before the damage is applied, and at the end of last learning step

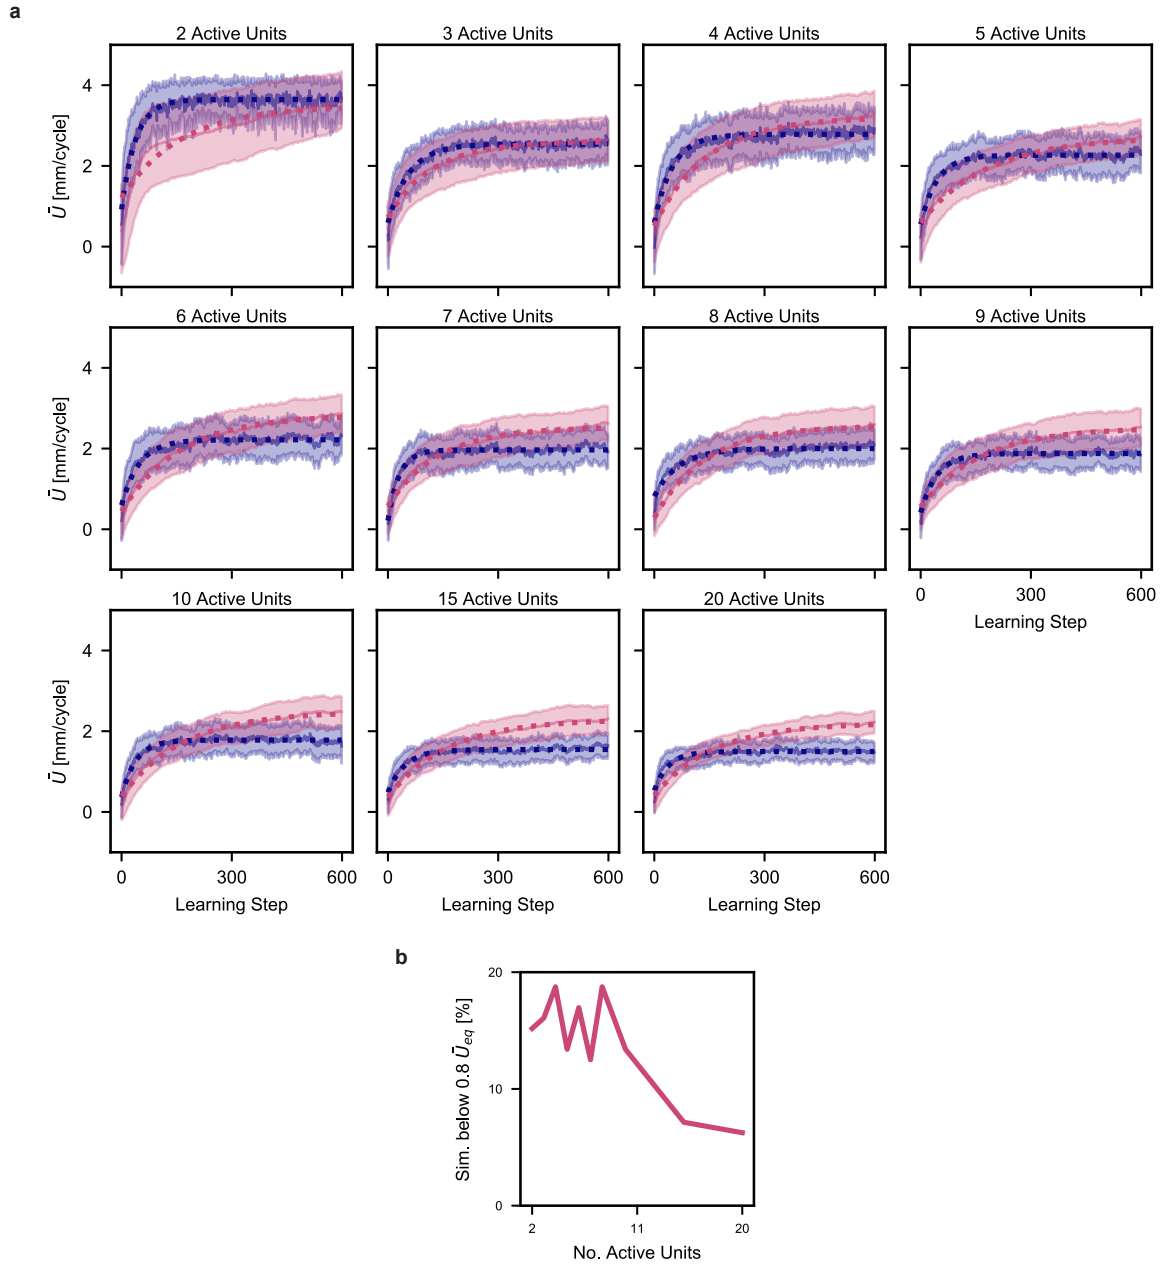

**Fig. S8. Scalability of the decentralized learning approach.** To study the effect of the number of units on the effectiveness of our updated learning algorithm, we performed numerical learning experiments on assembled robots consisting of two to twenty active units (and one dummy unit). We performed these simulations for two different step sizes of  $\Delta s = 0.1$  and  $\Delta s = 0.025$ , in blue and pink respectively. **a**, Solid lines represent the average over 112 simulations, while the shaded area represents the standard deviation. The average curves have been fitted by an exponential function  $y = \bar{U}_{eq} - (\bar{U}_{eq} - \bar{U}_0) e^{-\gamma x}$ , shown by the dashed line. **b**, Percentage of simulations for  $\Delta s = 0.025$  not reaching the  $0.8 \bar{U}_{eq}$  threshold within 600 learning steps. Note that for  $\Delta s = 0.1$  all simulations reach  $0.8 \bar{U}_{eq}$ .

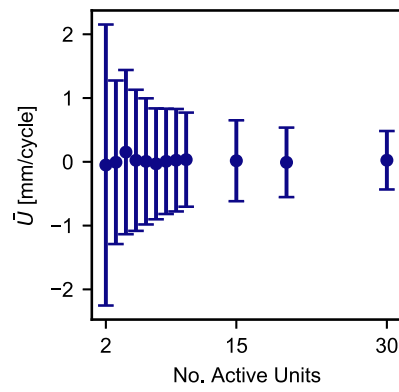

**Fig. S9. Sampling the scalable behavior.** Simulated system velocity as a function of the number of active units. The dots represents the average value, and the bars indicate standard deviation values over the 1000 random samples per system size.

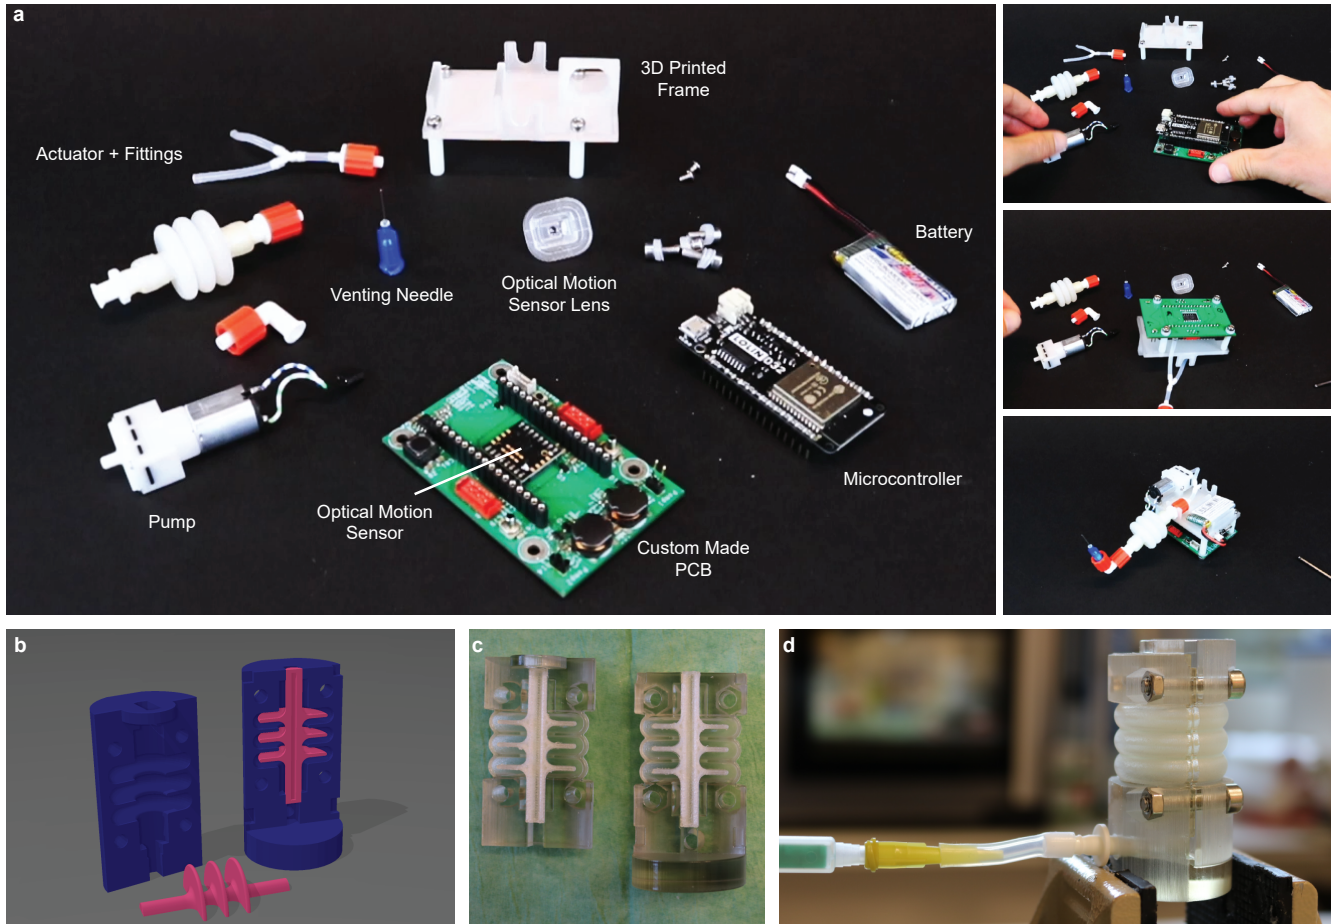

**Fig. S10. Unit assembly and bellow actuator fabrication.** **a**, Overview of unit components and assembly process. **b**, CAD models of bellow actuator moulds. The outer mould (in blue) was printed in VeroClear (Stratasys Eden260VS), and the inner core (in pink) was printed in soluble PVA (Ultimaker 3). **c**, 3D printed parts before casting. **d**, Injection casting of bellow actuator with Dragon Skin 30 (Smooth-ON).

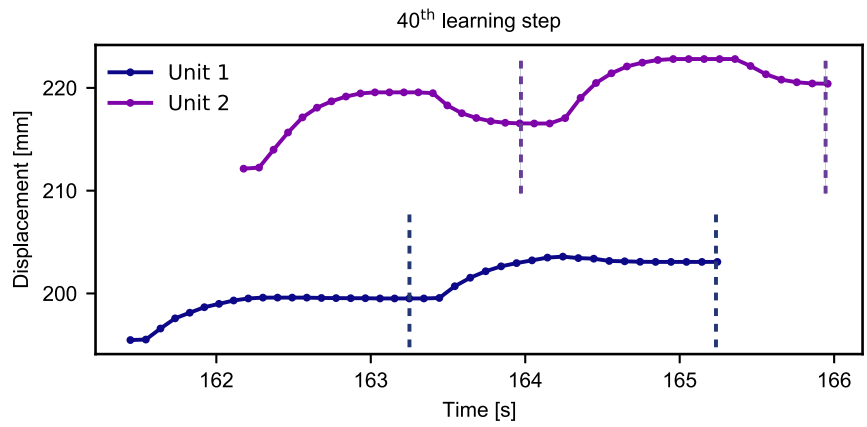

**Fig. S11.** Measured displacements at the 40<sup>th</sup> learning step by the two active units in the learning experiment shown in Fig. 1d. The vertical dashed lines mark the beginning and end of the second cycle, that is used to calculate the units' average velocities  $U_1$  and  $U_2$ .



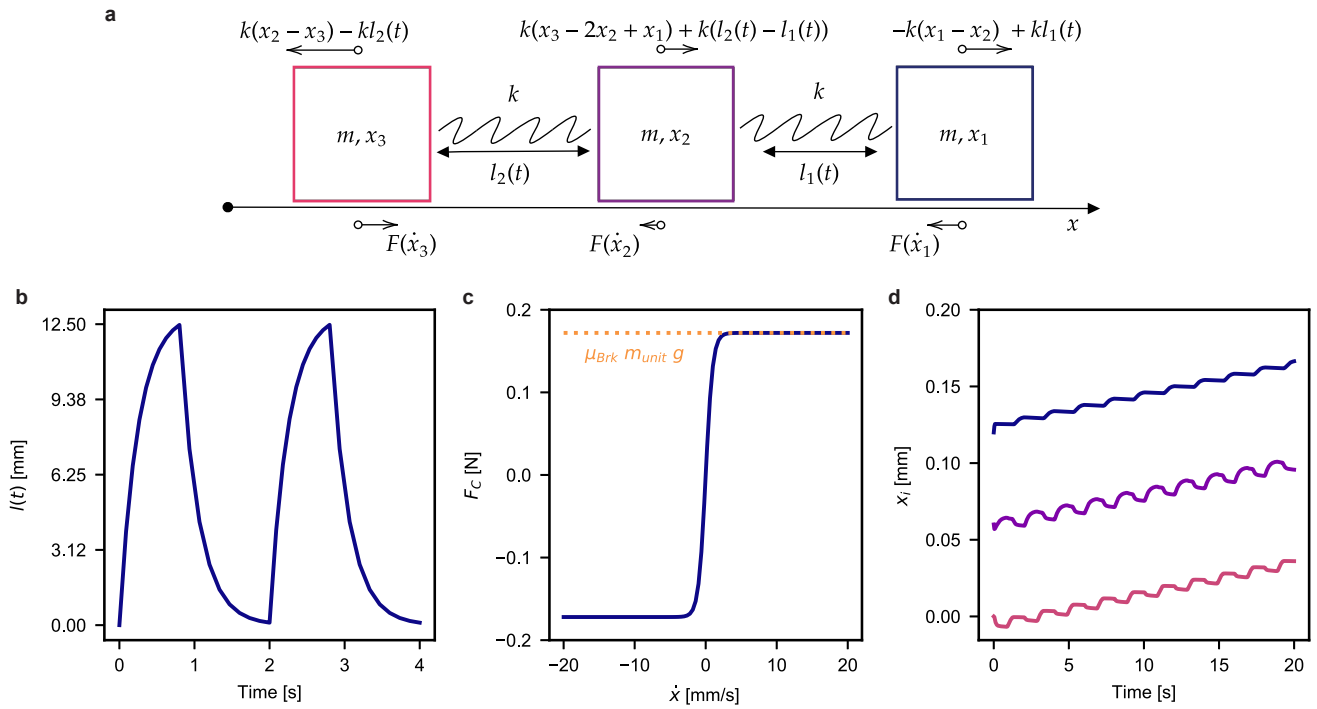

**Fig. S12. Numerical model schematic and implementation.** **a**, Mass-spring model schematic for an assembled robot consisting of two active units (and one dummy unit). **b**, Actuator's preferred spring length  $l(t)$  as a function of time for the specific case of  $\phi = 0$ . **c**, Modelled Coulomb friction  $F_C$  as a function of the relative velocity  $\dot{x}$  to the ground. **d**, Example of displacements  $x_i$  for the three masses in a learning step of  $n_{act} = 10$  actuation cycles, with  $\phi_1 = 0$  and  $\phi_2 = 0.4$ .

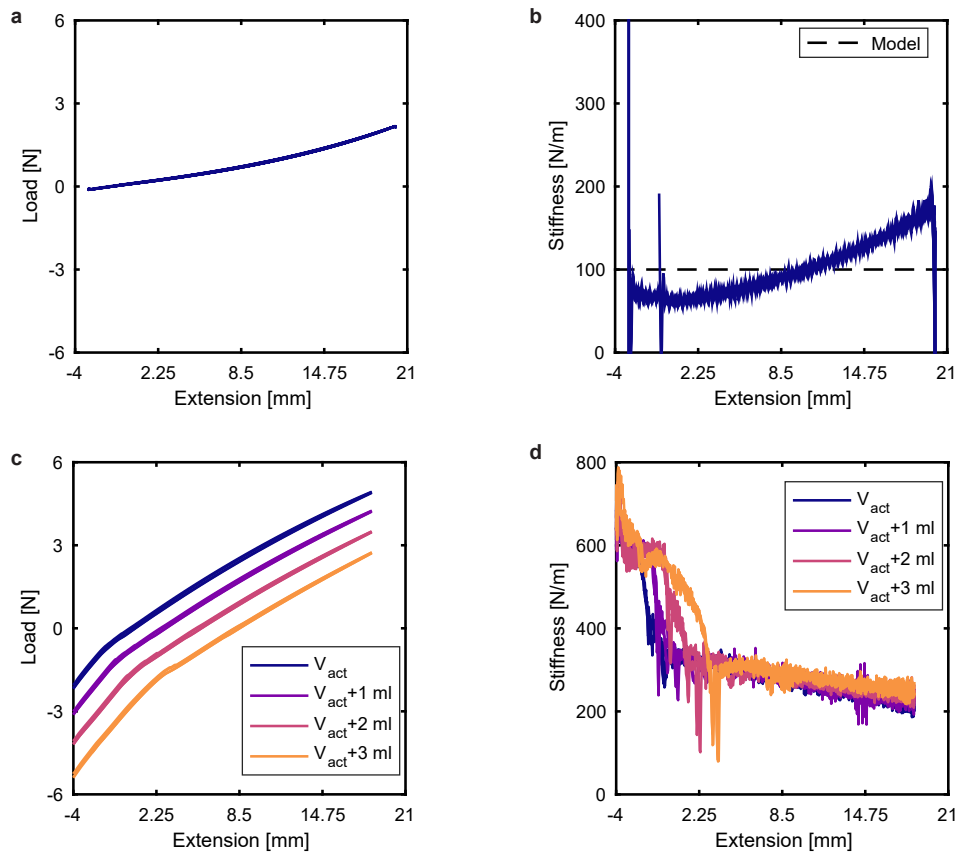

**Fig. S13. Characterization of a soft actuator.** **a, b,** Force-extension and stiffness-extension response of an actuator open to the environment. The value  $k = 100 \text{ N/m}$  was chosen as actuator stiffness in the numerical model. **c, d,** Force-extension and stiffness-extension response for an actuator closed to the environment (i.e., contains a fixed amount of air), for increasing enclosed air volumes from  $V_{tot} = V_{act}$  to  $V_{tot} = V_{act} + 3 \text{ ml}$ , in steps of  $1 \text{ ml}$ .

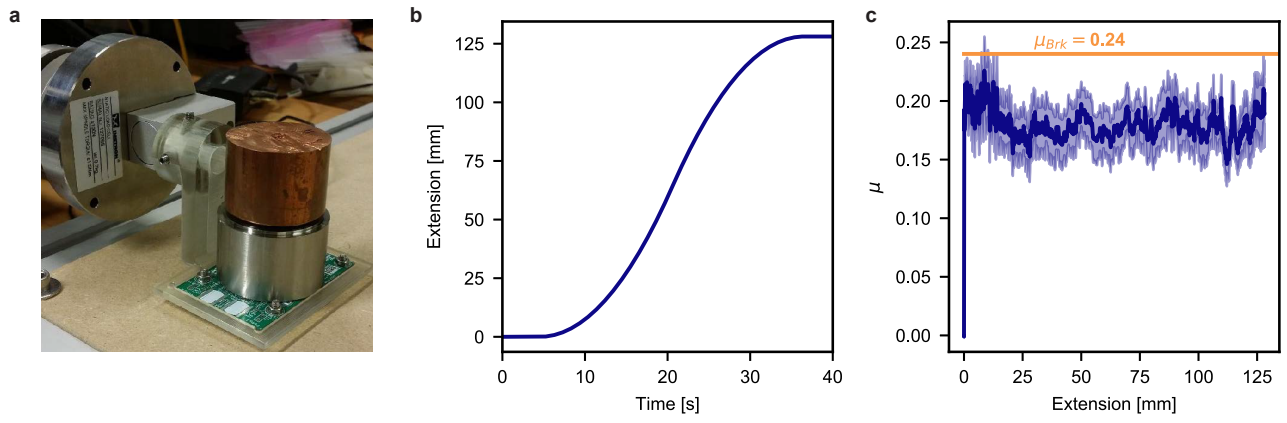

**Fig. S14. Friction characterization between the unit and the table.** **a**, overview of the horizontal friction characterization experiment. Additional weight has been added to the unit to increase the magnitude of the force and reduce relative noise. **b**, Applied displacement (extension) profile as a function of time. **c**, Measured friction coefficient, and standard deviation, as function of the applied extension. The value  $\mu_{Brk} = 0.24$  was chosen as breakaway friction coefficient to use in the numerical model.

165 **Movie S1. Learning experiment for an assembled robot.** In this video we show learning experiments for two  
166 and three active unit (and one dummy unit) with Thermal algorithm, and a learning experiment with three  
167 active unit (and one dummy unit) with Flaky algorithm.

168 **Movie S2. Influence of track on the robot motion.** In this video we show the variability of the track by  
169 performing two experiments with fixed actuation phases on a robot assembled from three active units (and  
170 one dummy unit).

171 **Movie S3. Adaptability to damage.** In this video we show how the assembled robot adapts to damage, by  
172 performing two experiments on a robot consisting of three active units (and one dummy unit), using the  
173 Thermal and Flaky algorithm.

174 **Movie S4. Scalability of the algorithm.** In this video we demonstrate that the Flaky algorithm can also be  
175 applied to larger systems, and perform an experiment on an assembled robot consisting of seven active units  
176 (and one dummy unit).

177 **Movie S5. Autonomous modular robot that learns how to move.** In this video we demonstrate that the  
178 proposed learning strategy does not need any digital connection between units, and that the robot can  
179 operate fully untethered outside lab settings. We show an experiment in which we assembled three active  
180 units (and a dummy unit), after which we let the assembled robot learn how to move. We subsequently  
181 shuffle the unit position such that a different locomotion pattern needs to be learnt.

## 182 **References**

- 183 1. KW Oh, K Lee, B Ahn, EP Furlani, Design of pressure-driven microfluidic networks using electric circuit analogy. *Lab on a*  
184 *Chip* **12**, 515–545 (2012).
- 185 2. B Armstrong, C de Wit, *Friction Modeling and Compensation, The Control Handbook*. (CRC Press), (1995).
